# Supplementary material for: Comparison of Ki-67 Labeling Index Patterns of Diffuse Large B-Cell Lymphomas and Burkitt Lymphomas Using Image Analysis: A Multicenter Study
Source: MDPI journal article supplement (doi:10.3390/diagnostics11020343), 2021-02-19
Supplement: s1 [file s1]

**Supplementary Table S1.** Comparison of Ki-67 labeling index patterns between Burkitt lymphomas (BLs), activated B-cell (ABC), and germinal center cell (GCB) subtype diffuse large B-cell lymphomas (DLBCLs).

|                                       |       | BLs<br>(n = 29) | DLBCL, ABC type<br>(n = 73) | DLBCL, GCB type<br>(n = 30) | p-value           |
|---------------------------------------|-------|-----------------|-----------------------------|-----------------------------|-------------------|
| <b>AGE</b>                            | years | 51.0 ± 24.8     | 62.8 ± 14.5                 | 60.5 ± 15.2                 | 0.043             |
| <b>SEX</b>                            |       |                 |                             |                             |                   |
| Male                                  | No.   | 18 (62.1%)      | 39 (53.4%)                  | 22 (73.3%)                  | 0.167             |
| Female                                | No.   | 11 (37.9%)      | 34 (46.6%)                  | 8 (26.7%)                   |                   |
| M:F                                   |       | 1:0.61          | 1:0.87                      | 1:0.36                      |                   |
| Total counted cells                   | No.   | 5752.6 ± 786.2  | 5587.5 ± 541.1              | 5753.2 ± 757.6              | 0.983             |
| Negative cells                        | No.   | 337.4 ± 385.4   | 656.5 ± 767.6               | 772.6 ± 571.4               | <b>0.013</b>      |
|                                       | %     | 5.9 ± 6.6       | 11.7 ± 14.0                 | 13.9 ± 11.1                 | <b>0.013</b>      |
| Positive cells                        | No.   | 5415.1 ± 850.9  | 4931.0 ± 905.0              | 4980.6 ± 997.1              | 0.076             |
|                                       | %     | 94.1 ± 6.6      | 88.3 ± 14.0                 | 86.1 ± 11.1                 | <b>0.013</b>      |
| 1+                                    | No.   | 37.8 ± 24.9     | 871.7 ± 599.3               | 595.8 ± 577.8               | <b>0.001</b>      |
|                                       | %     | 0.7 ± 0.5       | 15.6 ± 10.8                 | 10.8 ± 10.8                 | <b>0.001</b>      |
| 2+                                    | No.   | 163.8 ± 102.3   | 1146.3 ± 570.4              | 718.6 ± 333.6               | <b>&lt; 0.001</b> |
|                                       | %     | 2.9 ± 1.7       | 20.4 ± 9.9                  | 12.4 ± 5.4                  | <b>0.001</b>      |
| 3+                                    | No.   | 5213.6 ± 825.7  | 2913.0 ± 1256.9             | 3666.2 ± 1227.8             | <b>&lt; 0.001</b> |
|                                       | %     | 90.6 ± 6.2      | 52.2 ± 22.2                 | 62.9 ± 16.8                 | <b>&lt; 0.001</b> |
| Proportion of 1+ in positive cells    | %     | 0.7 ± 0.5       | 18.1 ± 12.6                 | 12.9 ± 12.8                 | <b>&lt; 0.001</b> |
| Proportion of 2+ in positive cells    | %     | 3.0 ± 1.8       | 24.2 ± 13.1                 | 14.6 ± 5.9                  | <b>0.001</b>      |
| Proportion of 3+ in positive cells    | %     | 96.3 ± 2.0      | 57.7 ± 20.8                 | 72.6 ± 15.4                 | <b>&lt; 0.001</b> |
| Proportion of 1+/2+ in positive cells | %     | 3.7 ± 2.0       | 42.3 ± 20.8                 | 27.4 ± 15.4                 | <b>&lt; 0.001</b> |
| Proportion of 2+/3+ in positive cells | %     | 99.3 ± 0.5      | 81.9 ± 12.6                 | 87.2 ± 12.3                 | <b>&lt; 0.001</b> |

Significant p-values are bolded and italicized.

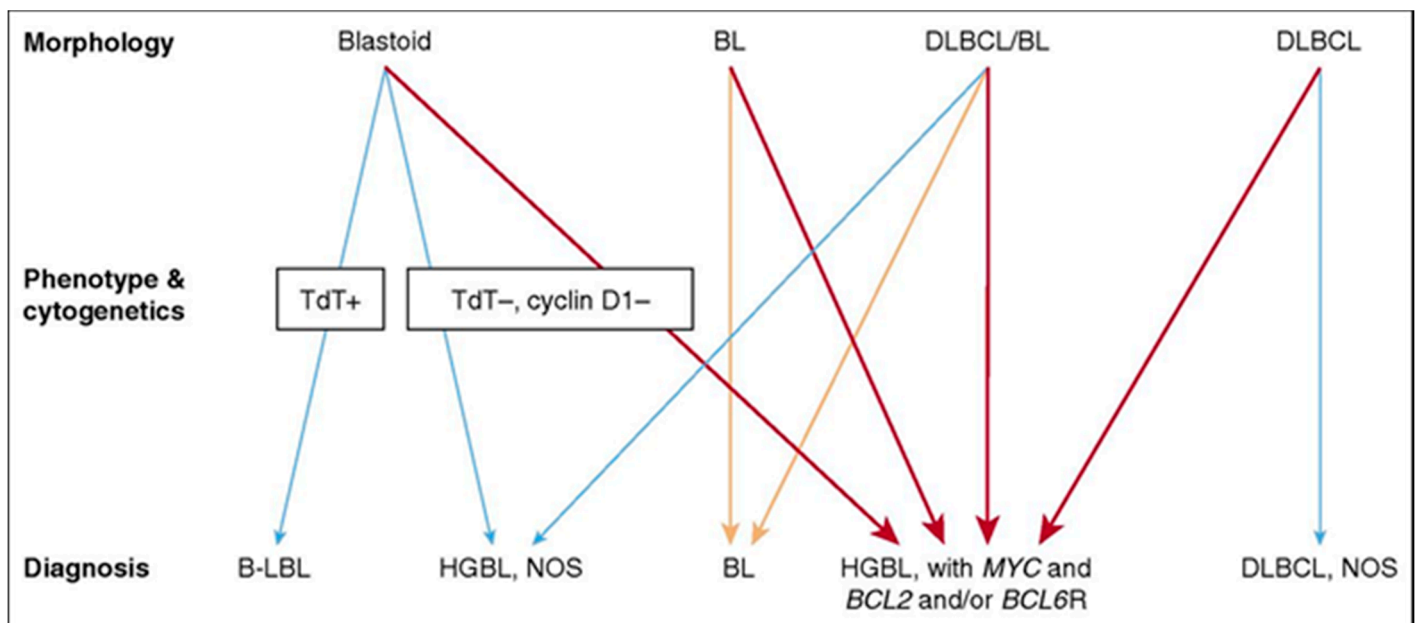

**Supplementary Figure S1.** Classification algorithm for high grade B-cell lymphomas (HGBLs) in the 2018 World Health Organization Classification.
